# Supplementary material
Source: Springer Nature journal article supplement (https://www.springermedizin.de/resource/supplementary/12889_2009_2059_MOESM2_ESM.pdf/9484466)
Supplement: MOESM2 [file 9484466]

## Original parent codes developed from initial analysis

Pain  
Primary Prevention  
Secondary Prevention  
General prevention (non knee)  
General health  
Health care  
Rainbow model  
Risk factor recognition

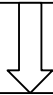

## Memo development

Making linkages between prevention nodes, health care use and rainbow model led to the core concept of responsibility.

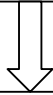

## Development of core concepts e.g. diagram below used to discuss responsibility

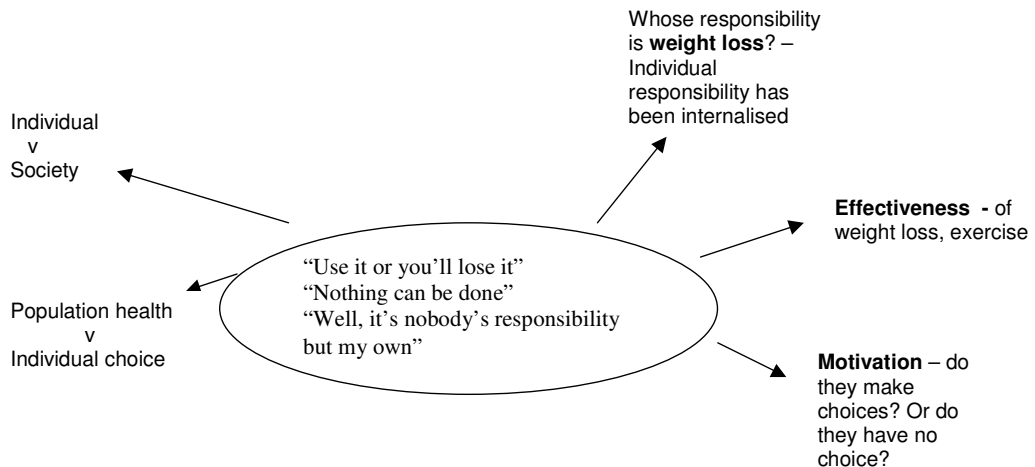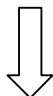

## Refined nodes and ‘coding on’

E.g. consideration of barriers and facilitators to take responsibility, and these two new codes were added to the framework, and used for ‘coding on’ of the prevention nodes.
